# Supplementary material
Source: Springer Nature journal article supplement (https://hal.science/hal-01341224v1/file/12711_2013_2605_MOESM3_ESM.pdf)

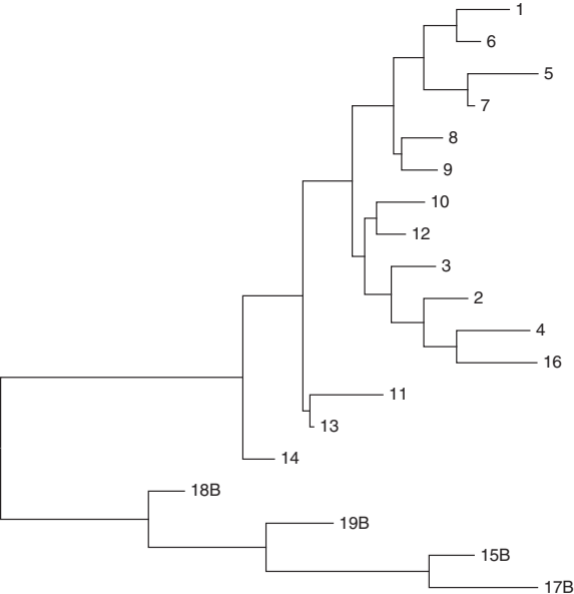

0.05

Supplement: MOESM3 [file 12711_2013_2605_MOESM3_ESM.pdf]
